# Supplementary material
Source: PubMed Central journal article supplement (PMC1603774)
Supplement: amjpathol_167_5_1309__1.pdf [file amjpathol_167_5_1309__1.pdf]

## **Supplemental Figures Legend**

### **Supplemental Figure 1**

Comparison of i.p. and i.v. routes of inoculation in ET-mediated lethality. Three female BALB/cJ mice were injected 100  $\mu$ l i.v. or 500  $\mu$ l i.p. with ET (PA+EF) or EF alone in sterile PBS at the indicated doses.

### **Supplemental Figure 2**

Histopathological evaluation of the kidney at 24 hours in (a) PBS-treated and (b) ET-treated animals reveals vacuolation of cortical tubular epithelial cells following ET administration. 40X objective.

### **Supplemental Figure 3**

Histopathological evaluation of the submandibular gland at 24 hours in (a) PBS-treated and (b) ET-treated animals reveals swollen and vacuolated acinar cells following ET administration. 40X objective.

### **Supplemental Figure 4**

Histopathological evaluation of the ovary at 36 hours in (a) EF-treated and (b) ET-treated animals reveals degeneration of tertiary follicles with dissociation of the thecal cells induced by ET. 20X objective.

### **Supplemental Figure 5**

Histopathological evaluation of the uterus at 36 hours in (a) EF-treated and (b) ET-treated animals reveals degeneration of the mucosal lining following ET administration. 10X objective.

### **Supplemental Figure 6**

Evaluation of blood smears demonstrates hypervacuolation of circulatory monocytes following ET treatment. 100X objective.

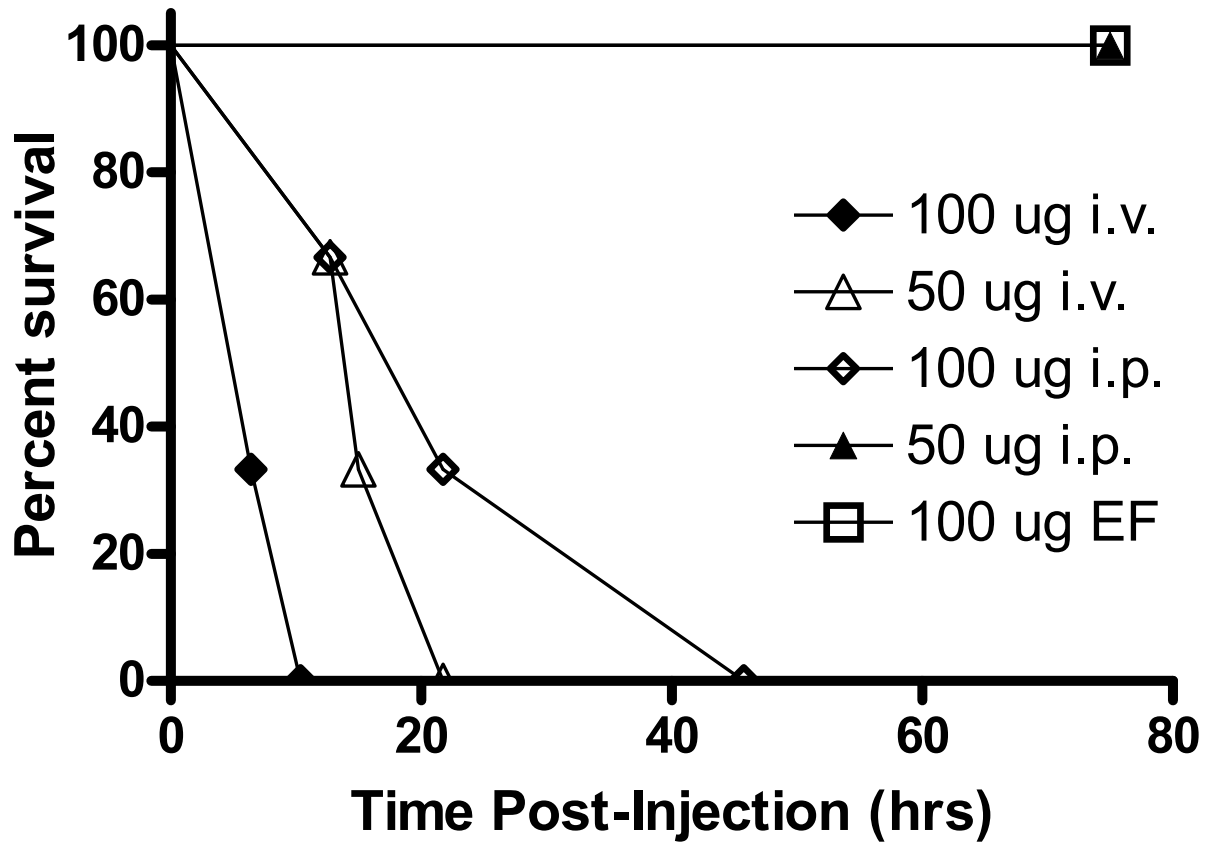

Supplemental Figure 1

**a**

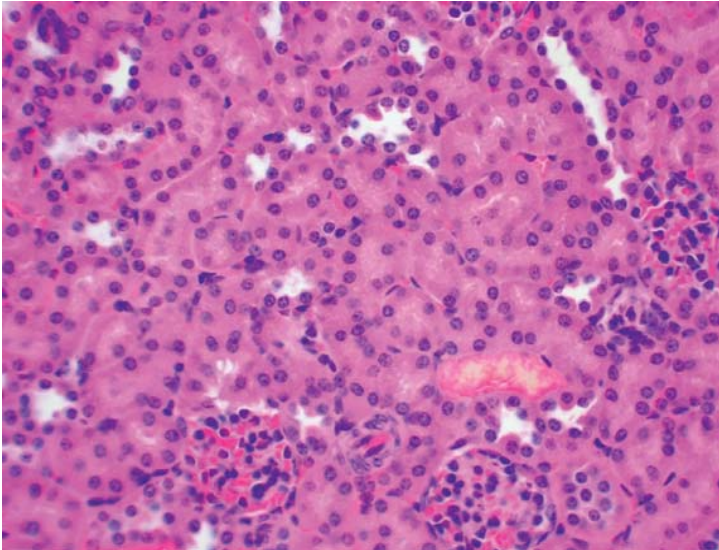

**b**

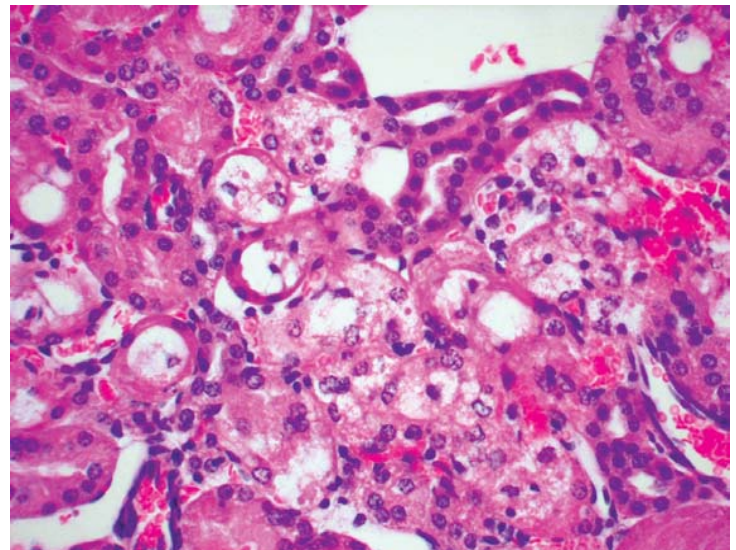

Supplemental Figure 2

**a**

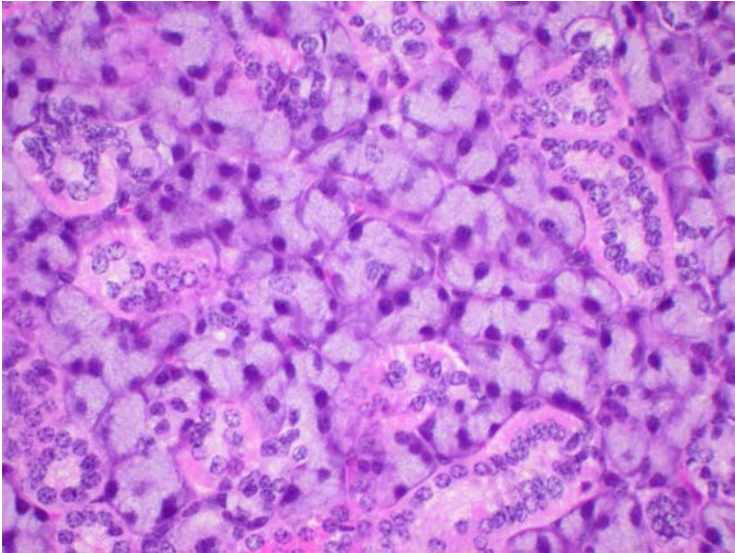

**b**

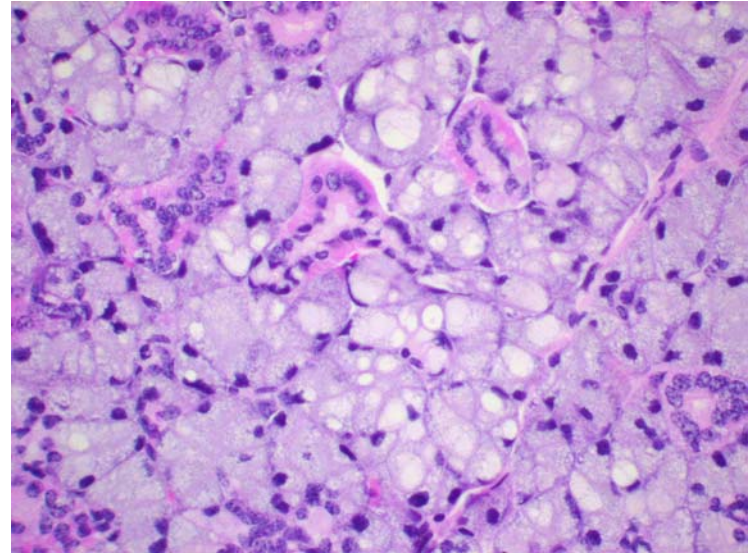

Supplemental Figure 3

**a**

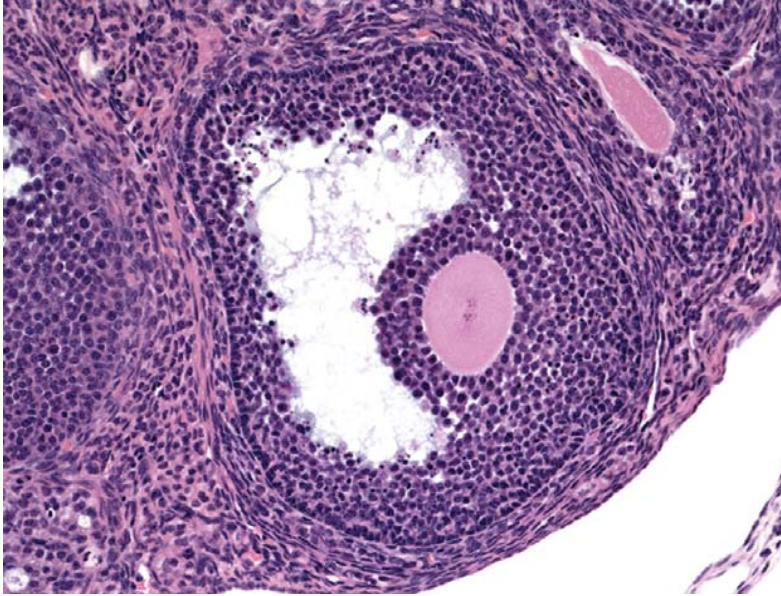

**b**

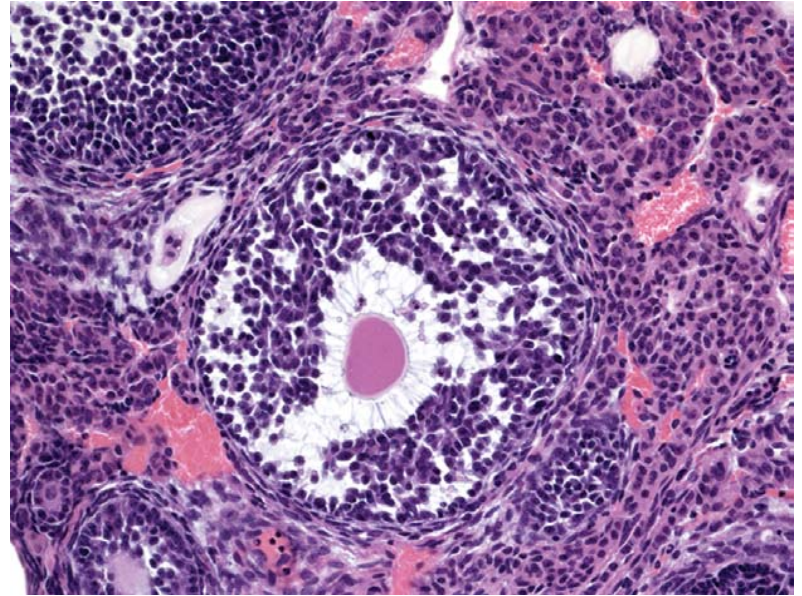

Supplemental Figure 4

**a**

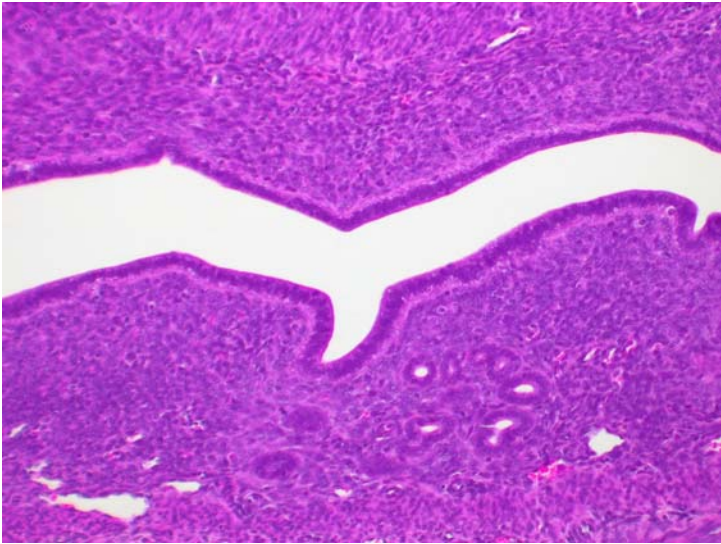

**b**

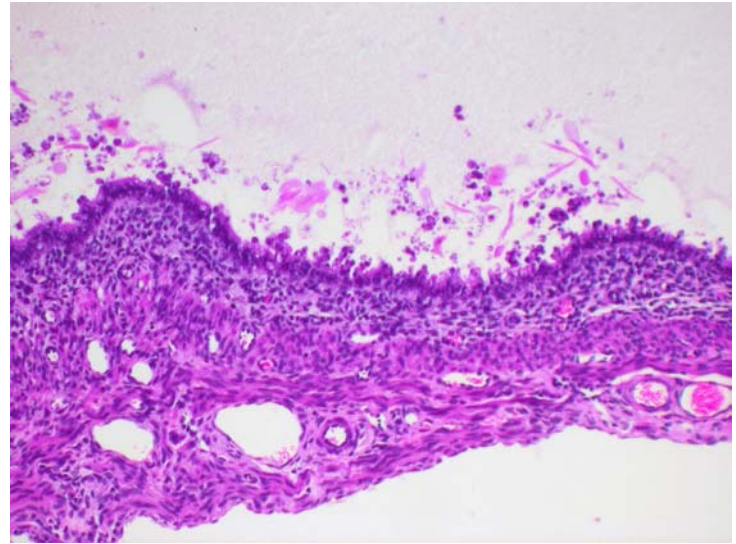

Supplemental Figure 5

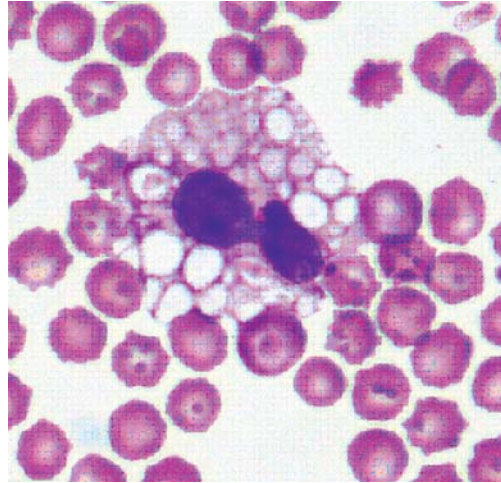

Supplemental Figure 6
